# Supplementary material
Source: PubMed Central journal article supplement (PMC2556811)
Supplement: pp.108.126201_2.pdf [file pp.108.126201_2.pdf]

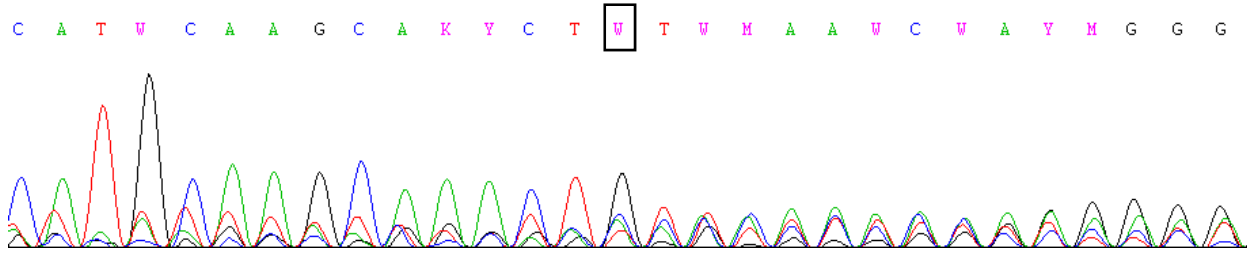

***ccmB*, Ler , -231**

**5' -CTCTTTTCTCGTAGTGTGCACAGTTTGCTTGCATGCCGCCTT- 3'**

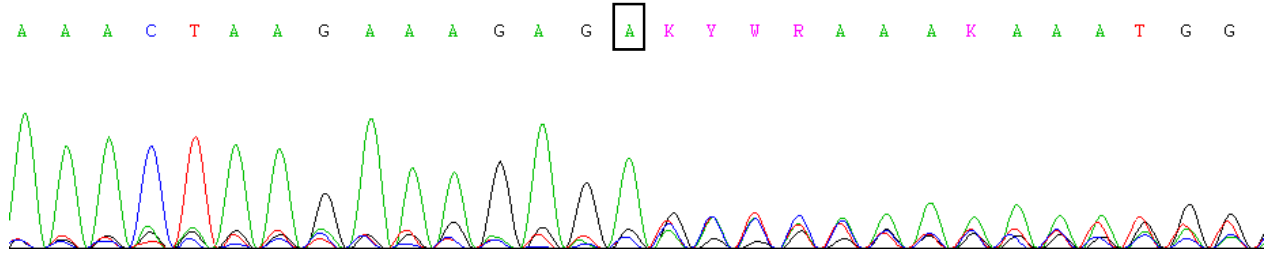

***ccmB*, Ler , -200**

**5' -TTGCATGCCGCCTTAGGCACATCTCTTTTCTTAGTTTTCATGC- 3'**

***nad4*, Ler , -390**

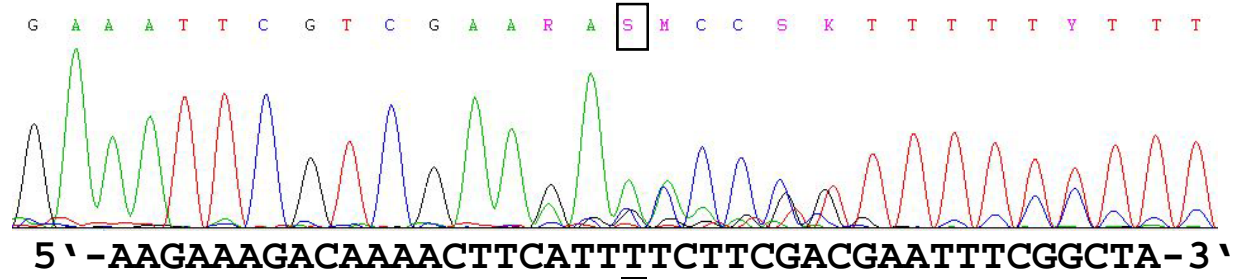

***ccmC*, C24: -390/-391**

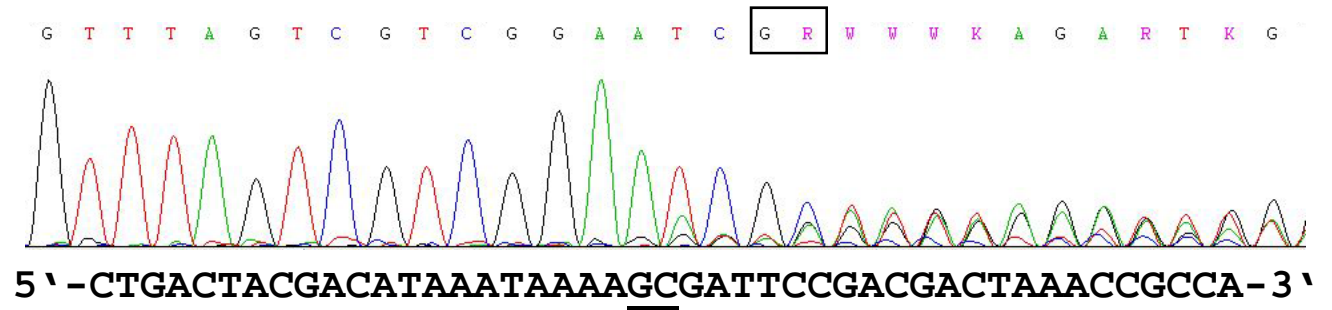

Diagrams of the direct sequence analysis of the PCR products identifying 5' ends of alternative mRNAs. The gene, accession and the position of the 5' end relative to the ATG (+1) are indicated. Boxes and underlines indicate the 5' terminal nucleotides.

**Forner et al., Supplementary Figure 2**
