# Supplementary material
Source: PubMed Central journal article supplement (PMC2556811)
Supplement: pp.108.126201_3.pdf [file pp.108.126201_3.pdf]

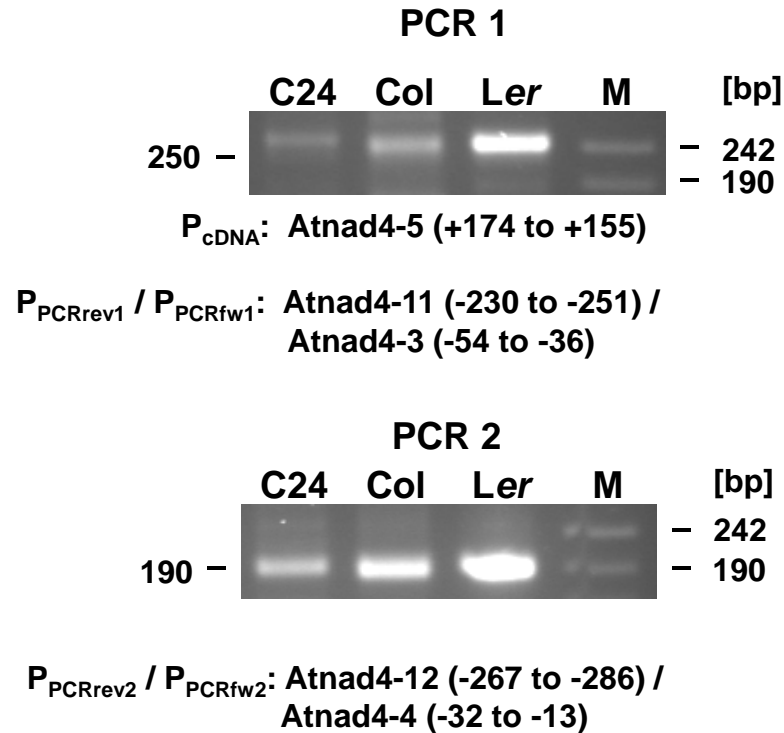

CR-RT-PCR approach specifically designed to detect the *nad4* -390 mRNA 5' end. The nested PCR (PCR2) was carried out with the products of the first PCR (PCR1). Identical amounts of total seedling RNA was used from each of the three accessions. The products with sizes of 250 bp (PCR 1) and 190 bp (PCR 2) contain the *nad4* -390 mRNA 5' end. Positions of primers are given as outlined in the legend of Fig.1
