# Supplementary material
Source: PubMed Central journal article supplement (PMC2556811)
Supplement: pp.108.126201_5.pdf [file pp.108.126201_5.pdf]

**A**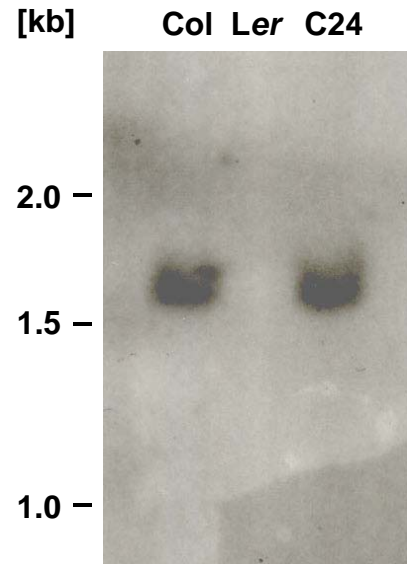**B**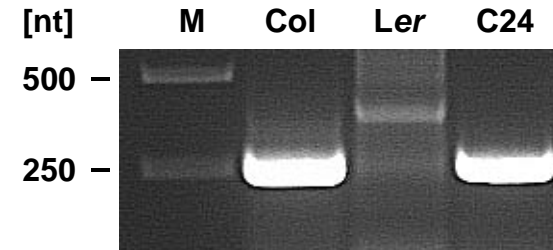

Analysis of the *atp6-2* gene in Col, Ler and C24. (A) Total DNA from seedlings of each accession was digested with BamHI, size fractionated on an agarose gel and transferred to a nylon membrane. A probe specific for *atp6-2* hybridizes to about 1.6 kb DNA fragments in C24 (as expected from the sequence (Unsel et al., 1996)) and Col. No hybridization is observed between this probe and DNA from Ler. (B) A PCR with oligonucleotides annealing to the 5' and 3' extremities of the *atp6-2*-specific part amplifies the respective product in C24 and Col, but not in Ler. In summary these experiments demonstrate that the *atp6-2*-specific sequences are not present in Ler suggesting that an *atp6-2* gene in the form anticipated from the mtDNA sequence from C24 does not exist in Ler.
